1 **Flexible recruitments of fundamental muscle synergies in the trunk and lower limbs for highly**  
2 **variable movements and postures**

3

4 **Hiroki Saito<sup>1,2</sup>, Hikaru Yokoyama<sup>1</sup>, Atsushi Sasaki<sup>1,3</sup>, Tatsuya Kato<sup>1,3</sup>, Kimitaka Nakazawa<sup>1\*</sup>**

5

6 <sup>1</sup> Graduate School of Arts and Sciences, Department of Life Sciences, The University of Tokyo, 3-8-1  
7 Komaba, Meguro, Tokyo, 153-8902, Japan.

8 <sup>2</sup> Department of Physical Therapy, Tokyo University of Technology, Ota-ku, Tokyo, 144-8535, Japan.

9 <sup>3</sup> Japan Society for the Promotion of Science, 5-3-1 Kojimachi, Chiyoda, Tokyo, 102-0083, Japan.

10

11 **Corresponding authors:**

12 \*Kimitaka Nakazawa, PhD

13 The University of Tokyo

14 Department of Life Sciences

15 Graduate School of Arts and Sciences

16 3-8-1 Komaba, Meguro-ku, Tokyo, 153-8902, Japan.

17 Phone: +81-3-5454-4317; Fax: +81-3-5454-6869

18 E-mail: nakazawa@idaten.c.u-tokyo.ac.jp

19 **Abstract**

20 The extent to which muscle synergies represent the neural control of human behavior remains unknown.  
21 Here, we tested whether certain sets of muscle synergies that are fundamentally necessary across  
22 behaviors exist. We measured the electromyographic activities of 26 muscles including bilateral trunk  
23 and lower limb muscles during 24 locomotion, dynamic and static stability tasks, and extracted the  
24 muscle synergies using non-negative matrix factorization. Our results showed that 13 muscle synergies  
25 that may have unique functional roles accounted for almost all 24 tasks by combinations of single and/or  
26 merging of synergies. Therefore, our results may support the notion of the low dimensionality in motor  
27 outputs, in which the central nervous system flexibly recruits fundamental muscle synergies to execute  
28 diverse human behaviors. Further studies using manipulations of the central nervous system and/or  
29 neural recording are required the neural representation with such fundamental components of muscle  
30 synergies.

## 31 Introduction

32 To execute human movements, the central nervous system (CNS) must control many degrees  
33 of freedom from thousands of motor units within hundreds of skeletal muscles <sup>1</sup>. To simplify the  
34 production of movements, the CNS may rely on a limited number of neural mechanisms <sup>2</sup>. Indeed, the  
35 CNS exploits a reduced set of pre-shaped neural pathways, called muscle synergies, to achieve a large  
36 variety of motor commands <sup>3,4</sup>. Muscle synergy theory assumes that the CNS combines a few sets of  
37 activation to build muscle activation commands <sup>5</sup>. Evidence of a limited set of muscle synergies has  
38 been found in various human motor behaviors such as locomotion <sup>6-9</sup>, reaching tasks <sup>10</sup>, and sports  
39 activities <sup>11-13</sup>.

40 It has been proposed that muscle synergies are shared across various motor tasks <sup>5,14,15</sup>.  
41 Shared synergies facilitate the robustness of the neuromuscular system, which is thought to be  
42 beneficial for stable postural control <sup>15,16</sup>, development <sup>17</sup>, and expert motor skills <sup>18</sup>. In contrast, studies  
43 have also discovered the existence of task specific synergies to meet each biomechanical demand of  
44 motor tasks <sup>19,20</sup>. An experimental study in frogs investigated muscle synergies during natural behaviors  
45 such as walking, jumping, and swimming, indicating that each motor behavior is the consequence of a  
46 combination of both synergies shared between behaviors and synergies specific to each or a few  
47 behaviors <sup>21</sup>. However, a substantial number of in-born and learned human movements and postures  
48 that presents different behavioral contexts also exist <sup>22</sup>. As such, it is possible that the sum of all shared  
49 and task-specific synergies employed during a variety of human movements and postures may exceed  
50 the number of relevant muscles <sup>23</sup>, violating the existence of a low dimensionality of human movement  
51 controls based on muscle synergy theory <sup>23,24</sup>.

52 A previous study found that upper-limb hand exploration tasks for five sectors (frontal, right, left,  
53 horizontal, and up) were modulated by seven muscle synergies (i.e., seven cluster centroids across  
54 participants) with different functional roles <sup>14</sup>. Furthermore, another study found that all three muscle  
55 synergies of cycling can be well reconstructed by merging muscle synergies extracted from walking <sup>25</sup>.  
56 Thus, the interpretation of existing literature suggests that the CNS may select the appropriate subsets  
57 of muscle synergies, either independently or merged, from a large set that are established to execute  
58 the substantial number of behavioral contexts and demands <sup>14,25,26</sup>. However, previous studies have not

59 recorded a large set of electromyographic (EMG) activities during a variety of human movements and  
60 postural tasks with different biomechanical contexts to investigate the neural basis of muscle synergies.

61 We hypothesized the existence of fundamentally necessary muscle synergies that account for  
62 a diverse range of human movements and postures. To investigate this possibility, we first extracted  
63 muscle synergies from an EMG recording dataset made from 24 motor tasks of the trunk and lower  
64 limb muscles to define the fundamental muscle synergies utilized across a highly variable context of  
65 movements and postures. We then examined how these fundamental muscle synergies were used in  
66 each motor task by comparing them to those extracted from the EMG datasets in each task.

## 67 **Methods**

### 68 *Experimental protocol*

69 Ten healthy volunteers (aged 21–35 years, all men) participated in the study. Each participant  
70 provided written informed consent for participation in the study. The study was conducted in accordance  
71 with the Declaration of Helsinki and was approved by the local ethics committee of the University of  
72 Tokyo.

73 We focused on fundamental movement and postural tasks that serve as building blocks for the  
74 efficient and effective execution of a variety of daily living activities and highly skilled actions such as  
75 sports<sup>22,27,28</sup>. Specifically, we used tasks that required movements through space (locomotion) and  
76 controls against gravity (stability) in any plane<sup>22</sup>. Thus, all participants were asked to perform the 24  
77 tasks described in Table 1. Supplementary Table S1 online presents the details of each movement and  
78 postural task. The order of tasks was randomly assigned.

### 79 *Data collection*

80 EMG activity was recorded from the following 26 muscles distributed across the trunk and lower  
81 limbs (13 bilateral muscles): tibialis anterior (TA), gastrocnemius medialis (MG), vastus medialis (VM),  
82 rectus femoris (RF), biceps femoris (long head, BF), gluteus maximus (GM), gluteus medius (Gmed),  
83 rectus abdominis (RA), oblique externus (OE), erector spinae at L2 (ESL2), erector spinae at Th9  
84 (ESTh9), erector spinae at Th1 (ESTh1), and latissimus dorsi (LD). EMG activity was recorded using a  
85 wireless EMG system (Trigno Wireless System; DELSYS, Boston, MA, USA). The EMG signals were

86 bandpass filtered (20–450 Hz), amplified (with a 300-gain preamplifier), and sampled at 1000 Hz.  
87 Three-dimensional ground reaction force data were recorded at 1000 Hz from the force plates under  
88 each belt of the treadmill.

### 89 *EMG processing*

90 The low-pass cut-off frequency influences the smoothing of EMG patterns and thus impacts the  
91 number of extracted modules<sup>29</sup>. To adequately compare EMG envelopes (i.e., EMG patterns with the  
92 same smoothing) of movements performed for various tasks that had different features of dynamic  
93 activities, the low-pass cut-off frequency must be adjusted for each task. Thus, an iterative adaptive  
94 algorithm was used to extract the optimal EMG envelopes<sup>30</sup>. This algorithm utilized information theory  
95 to find a sample-by-sample optimal root-mean-square window for envelope estimation<sup>30</sup>. This algorithm  
96 allowed the filter to adequately follow fast changes in EMG activity while maintaining optimal extraction  
97 when the EMG amplitude is changing slowly<sup>30</sup>. A previous study used this algorithm and successfully  
98 reconstructed muscle synergies during walking in individuals with and without transfemoral amputation  
99<sup>31</sup>. The smoothed EMG envelopes were time-interpolated to generate 200 timepoints for each trial,  
100 except for the right and left single-leg stance tasks.

101 We created the following two types of EMG matrices for each subject to examine the repertoire  
102 of fundamentally necessary muscle synergies and how these synergies are used in each task. Similar  
103 to previous studies<sup>14,32</sup>, we pooled the EMG matrices of all 24 tasks to create an “all-task” EMG matrix  
104 for each subject (i.e., the matrix was composed of the 26 muscles × the summation of timepoints of the  
105 24 single-task EMG matrices) to extract fundamental muscle synergies across all tasks. We also  
106 created a “single-task” EMG matrix composed of the 26 muscles × 1400 timepoints (seven strides or  
107 repetitions × 200 timepoints for each task, except the right and left single-leg stances) for each of the  
108 24 tasks to extract muscle synergies.

### 109 *Muscle synergy analysis*

110 In our analysis, we first identified the muscle synergies of each task for each subject using a  
111 factorization algorithm of single-task EMG matrices, and then synergies of all tasks were extracted from  
112 all-task EMG matrices using the same algorithm. We then proceeded to characterize representative

113 muscle synergies of individual tasks and all tasks across all participants using a hierarchical clustering  
114 algorithm. Lastly, we analyzed the similarity between synergy cluster centroids of each individual task  
115 and single or merged synergies of the all-task matrix to investigate how muscle synergies utilized by all  
116 tasks contribute to the execution of each individual movement.

117 To explore muscle synergies, nonnegative matrix factorization (NMF) was used for each  
118 subject from the single-task EMG matrices and the all-task EMG matrix. NMF has previously been  
119 described as a linear decomposition technique<sup>33,34</sup> according to equation (1):

120

$$121 \quad M = W \cdot C + e \quad (1)$$

122

123 where  $M$  ( $m \times t$  matrix, where  $m$  is the number of muscles and  $t$  is the number of samples, i.e., the  
124 spatiotemporal profiles of muscle activity) is a linear combination of muscle weighting components:  $W$   
125 ( $m \times n$  matrix, where  $n$  is the number of muscle synergies) and  $C$  ( $n \times t$  matrix, representing temporal  
126 pattern components; and  $e$  is the residual error matrix. Each EMG vector in the matrix corresponding  
127 to each muscle activity was normalized to the maximum amplitude across all tasks so that all muscle  
128 scales ranged from 0 to 1. Prior to extracting muscle synergies, each muscle vector in the data matrix  
129 was standardized to have unit variance, thus ensuring that the activity in all muscles was equally  
130 weighted. However, after each synergy extraction, the unit variance scaling was removed from the data  
131 so that each muscle variable ranged from 0 to 1 for data inspection and interpretation<sup>35</sup>. To determine  
132 the number of muscle synergies, NMF was applied to extract each possible  $n$  from 1 to 26 from each  
133 dataset. The variance accounted for (VAF) by the reconstructed EMG ( $M$ ) was calculated at each  
134 iteration to extract the optimal number of muscle synergies. VAF was defined as a 100  $\times$  square of the  
135 uncentered Pearson's correlation coefficient<sup>36,37</sup>. To prevent the extracted synergies from assuming a  
136 suboptimal local minimum, each synergy extraction was repeated 100 times. Thus, the iteration with  
137 the highest VAF was maintained<sup>8</sup>. We defined the optimal number  $n$  as the number fulfilling the  
138 following two criteria: First,  $n$  was selected as the smallest number of modules that accounted for >90%  
139 of the VAF<sup>36</sup>. Second,  $n$  was the smallest number to which adding another module did not increase  
140 VAF by >5%<sup>38</sup>.

141 *Clustering the modules across participants*

142 We identified the representative synergy vectors across participants using hierarchical  
143 clustering analysis (Ward's method, Euclidian distance) of muscle synergies for each task and all tasks  
144 <sup>8,39</sup>. The optimal number of clusters was determined using the gap statistic <sup>40</sup>. Subsequently, the muscle  
145 synergies in each cluster were averaged across participants.

#### 146 *Contributions of the muscle synergy of all tasks to the execution of each task*

147 To explore whether the muscle synergy defined by the all-task matrix contributes to executing  
148 each task of movements and postures, the similarity between muscle synergies of single-task and all-  
149 task matrices was quantified by the scalar product (SP) between these centroids of the synergy clusters  
150 (normalized to unit vectors). For every comparison, each of the synergy cluster centroids of all-task was  
151 matched to a synergy cluster centroid of each task by maximizing the total scalar product values.  
152 Synergy clusters that could not be matched with  $SP \geq 0.75$ , were classified as unmatched <sup>41</sup>.

#### 153 *Contributions of merging muscle synergy of all tasks towards single-task execution*

154 We also expected that all-task muscle synergies can be merged to execute each single task of  
155 movement and posture <sup>40</sup>. Thus, the merged synergies as a linear combination of the contributing  
156 synergies were modeled by the following formula <sup>18,41</sup>:

157

$$158 \quad W_k \approx \sum_{i=0}^{N_b} D_i W_i, k = 1, \dots, n_b$$

159

160 where  $W_k$  is the  $k$ th muscle synergy vector from each individual task,  $W_i$  is the  $i$ th muscle synergy vector  
161 derived from an all-task matrix,  $N_b$  is the number of synergies that contribute to the merging, and  $D_i$  is  
162 a non-negative coefficient that scales the  $i$ th synergy in the merging.  $D_i$  was obtained from a non-  
163 negative least-squares fit, implemented using MATLAB (function `lsqnonneg`).  $W_k$  and  $W_i$  were  
164 normalized as unit vectors. Following criteria from previous studies <sup>18,41</sup>, the synergy merging was  
165 identified when  $N_b \geq 2$ ,  $D_i \geq 0.2$  for all  $i$ , and the SP between  $\sum_{i=0}^{N_b} D_i W_i$  and  $W_k$  was  $\geq 0.75$ .

166 To assess whether the synergies from each task can be explained as merging of synergies  
167 from all tasks, we first identified the synergy cluster centroids of single-task and synergies of the all-

168 task (described above) and reconstructed each synergy cluster centroid of each individual task by  
169 merging every possible combination of the synergy cluster centroids of all tasks.

## 170 **Results**

### 171 *Muscle synergies extracted from all-task EMG matrices*

172 Figure 1 presents 13 muscle synergies of an all-task matrix incorporating 24 trunk and lower  
173 limb movement tasks (W1 to W13), which were grouped by cluster analysis across ten participants;  
174 Table 2 summarizes the characteristics of the muscle synergies. Visual inspection revealed that muscle  
175 synergies W1 to W5 were largely composed of the right-side muscles, while muscle synergies W6 to  
176 W10 were mainly composed of the left-side muscles. Thus, we categorized W1 to W5 as muscle  
177 synergies with right-side dominant patterns and W6 to W10 as muscle synergies with left-side dominant  
178 patterns. The following pairs showed high similarity when the muscles in W6 to W10 were reordered so  
179 that muscles on the left side of W6 to W10 corresponded to the same muscles on the right side of W1  
180 to W5: W1 and W6 (SP = 0.93), W2 and W7 (SP = 0.97), W3 and W8 (SP = 0.97), W4 and W9 (SP =  
181 0.85), W5, and W10 (SP = 0.93). Others such as W11, W12, and W13 were categorized as bilateral  
182 patterns.

### 183 *Relationship between muscle synergies extracted from all-task EMG matrices and those extracted* 184 *from single-task matrices*

185 Table 3 presents the number of muscle synergies in each task, which were well explained (SP  
186 > 0.75) by independent and merged muscle synergies from the all-task EMG matrices. Of note, all  
187 synergies of each task except the one for the left single-leg stance could be explained by either single  
188 or linear combination of multiple synergies from the all-task EMG matrices (SP > 0.75). The details of  
189 the contributions of muscle synergies of all tasks to each task execution are presented in  
190 Supplementary Table S2 online.

191 Figures 2 and 3 present examples of relationships between muscle synergies from the all-task  
192 EMG matrices and those from the single-task EMG matrices: locomotion tasks including walking,  
193 running, bilateral jump and sit-to-stand-to-sit (Fig. 2), and stability tasks including left lunge, cat-and-  
194 dog, forward bend, and left rotation (Fig. 3). The relationships between muscle synergies from the all-



195 task EMG matrices and those from the other single-task EMG matrices are shown in Supplementary  
196 Figs. S1 and S2 online.

## 197 **Discussion**

198 Several studies have investigated shared or merged muscle synergies across different tasks  
199 such as walking and running<sup>8,42</sup>, walking and cycling<sup>25</sup>, various directions of reaching<sup>14,32</sup> and stepping  
200 and non-stepping postural controls<sup>35</sup>. Their results indicated that different human behaviors use the  
201 fundamental motor modules that reflect the functional control units as a neural constraint on motor  
202 outputs. However, the extent to which representations of muscle synergies in the control of diverse  
203 human behaviors have not been comprehensively investigated in previous studies. In our study, we  
204 extracted muscle synergies from a large set of EMG (26 muscles) activities across bilateral locations of  
205 the trunk and lower limbs during 24 locomotion and stability tasks that were fundamental for a variety  
206 of physical activities. We found that 13 clusters of fundamental muscle synergies accounted for almost  
207 all synergy clusters of each of the 24 tasks. When we compared the synergy clusters extracted from  
208 individual tasks across participants, we found a high similarity ( $SP > 0.75$ ) of a single or multiple linear  
209 combinations from the 13 fundamental muscle synergy clusters extracted from all tasks across  
210 participants. In the following sections, we discuss the possible neural mechanism underlying a diverse  
211 set of human behaviors based on the assumptions that muscle synergies represent motor modules to  
212 coordinate patterns utilized by the CNS<sup>24</sup>.

### 213 *Characteristics of muscle synergies across 24 tasks*

214 We applied cluster analysis to the muscle synergies from the all-task EMG matrix across  
215 participants, and identified 13 synergy clusters. As shown in Table 2, we broadly categorized muscle  
216 synergies into three sets based on the major contributions of the muscles (i.e., right muscle patterns,  
217 left muscle patterns, and bilateral muscle patterns). In the right and left muscle patterns, W1 and W6  
218 were dominated by muscles around the ankle and knee joints (i.e., TA, RF, and VM). W2 and W7 were  
219 mainly composed of muscles related to the knee and hip joints (i.e., RF, VM, Gmed, and GM), and W3  
220 and W8 employed the ankle and hip joints (i.e., MG and Gmed). Furthermore, BF mainly contributed to  
221 W4 and W9. While all four pairs were predominantly composed of extensor muscles that can move and  
222 stabilize the body during locomotion and postural tasks, they may have a distinct functional feature

223 because the different tasks require different combinations of muscle synergies (Supplementary Table  
224 S2 online). In contrast, the pairs of W5 and W10, W11, W12, and W13 were composed of back muscles  
225 (i.e., ES, LD) and abdominal muscles (i.e., RAS and OE) either in unilateral or bilateral patterns (Table  
226 2). Notably, they were widely observed across 24 tasks (Supplementary Table S2 online) and may be  
227 used for bilateral trunk movements or stabilization of the body accompanied by W1 to W10 with  
228 relatively low levels of trunk muscle activities when the lower limbs are moving<sup>43</sup>. Although we still do  
229 not know how muscle synergies in our study arise and whether they reflect neural structure for motor  
230 outputs, 13 muscle synergies extracted from our study may form a repertoire of whole lower limb and  
231 trunk muscle activation patterns, which can be shaped by biomechanical interactions and constrain the  
232 environment through a lifetime<sup>18,44</sup>.

### 233 *Hypothetical neural mechanisms underlying muscle-synergy controlling diverse behavior*

234 If we assume that the muscle synergy extracted from the whole-task EMG matrices in our data  
235 may have a unique set of networks in which each synergy provides functionally necessary compositions  
236 in muscle activities, then one can expect that any combinations of these synergies may provide stable  
237 and predictable motor outputs in a diverse range of human behaviors<sup>44</sup>. The strength of our finding is  
238 that it indicates that there is a set of fundamental muscle synergies shared with different combinations  
239 of these synergies in single and/or merging states to produce 24 locomotion and stability tasks.  
240 Considering that several previous studies in animal and human experiments have confirmed that  
241 muscle synergies observed in motor behaviors have cortical and subcortical neural underpinnings<sup>45–48</sup>,  
242 it can be reasonably assumed that they are inherently robust and may be encoded in the CNS. Here,  
243 we hypothesize the existence of neural mechanisms underlying the flexible recruitment of muscle  
244 synergies in various combinations for executing a variety of movements and postures. For example, we  
245 extracted four synergy clusters in locomotion tasks, including walking, running, and bilateral jumps.  
246 Surprisingly, as shown in Fig. 2 and Supplementary Table S2 online, all synergies in the three tasks  
247 used almost the same synergies of all tasks with different combinations to be merged ( $SP > 0.8$ ).  
248 Furthermore, even in the unique dynamic tasks such as cat-and-dog as well as simple axial tasks such  
249 as forward bend and rotation, subsets of these 13 fundamental muscle synergies were used, either  
250 independently or in a merging state (Fig. 3 and Supplementary Table S2 online).

251            Interestingly, we found that muscle synergies in 24 locomotion and stability tasks were  
252            predominantly reconstructed by merging various combinations of fundamental muscle synergies (Table  
253            3). A study reported that muscle synergies of cycling can result from merging synergies of walking <sup>25</sup>.  
254            Another recent study showed the merging of original muscle synergies during running through running  
255            training <sup>18</sup>. It is suggested that merged synergies were the result of the co-recruitment of multiple muscle  
256            synergies by neural networks driving the muscle synergies represented as  $C$  in equation 1 <sup>24,44</sup>. Based  
257            on previous studies, we speculate that the upstream driving layer (e.g.,  $C_{task}$  in Fig.4) may flexibly recruit  
258            the fundamental muscle synergies (e.g.,  $W'$  in Fig. 4) located at different levels from the driving layers  
259            in the motor hierarchy to execute highly variable tasks (the schematic structure in Fig. 4). Our  
260            hypothesis is possibly equivalent to a generalized two-level CPG model for the control of locomotor  
261            muscle activity <sup>49</sup>. The model consists of two distinct neural network layers: 1) a pattern formation (PF)  
262            network layer that defines groups of synergistic and antagonistic motoneuron pools and 2) a rhythm  
263            generation layer that controls the activity of PF networks. However, it should be noted that the exact  
264            neural substrates encoding muscle synergies and their driving networks in humans remain largely  
265            unknown.

266            Since we propose that upstream driver  $C$  presents synchronous recruitments of the  
267            fundamental muscle synergies that have distinct functional roles in organizing muscle synergies for the  
268            24 locomotion and stability tasks, it is possible that the CNS may also coordinate other simple or  
269            complex human behaviors using certain combinations of these synergies. Thus, muscle synergies  
270            during human behaviors found in previous extensive research may reflect layered structures composed  
271            of the fundamental muscle synergies extracted from our study. The advantage of these hypothetical  
272            mechanisms is that it prevents the sum of all muscle synergies from exceeding the number of relevant  
273            muscles utilized during diverse human behaviors, supporting the premise of compendium in  
274            coordinative patterns to execute several movements under different biomechanical conditions <sup>23</sup>.  
275            Further research is needed to investigate the muscle synergies identified by factorization algorithms  
276            coupled with CNS manipulations and/or neural recordings (e.g., CNS stimulations, spinalization, and  
277            electroencephalogram) to validate the neural representation of the fundamental muscle synergies  
278            observed in our study <sup>24</sup>.

279            *Clinical implications*

280           The results of this study may have several clinical implications. First, several studies have  
281 investigated muscle synergies in individuals with different characteristics, such as musculoskeletal and  
282 neurological disorders <sup>50-52</sup> as well as athletes <sup>8,18,53</sup>. Since we identified the fundamental muscle  
283 synergies that may underlie diverse human behaviors in healthy individuals, investigating the changes  
284 in muscle synergies such as the number of synergies as well as their compositions in a population of  
285 interest may facilitate the understanding of distinct features in motor controls that are associated with  
286 severity of symptoms <sup>50,54</sup> or that profile myriad skills and performance in athletes <sup>27,28</sup>. Second, recent  
287 studies have shown the efficacy of muscle synergy-based interventions using functional electrical  
288 stimulations (FES) on motor performance in stroke survivors <sup>55,56</sup>. Since our study found that each  
289 synergy may have functionally plausible patterns that play an important role in executing diverse human  
290 movements and postures, it may provide a rationale for designing interventions that use FES to focus  
291 on these functional sets of muscle synergies to improve motor performance. Lastly, we found that  
292 different tasks with various biomechanical demands and constraints may largely share the same muscle  
293 synergies with different combinations of synergies to be merged. Thus, clinicians may choose to  
294 intensively train a particular task to transfer the effectiveness to other tasks <sup>57</sup>, given that the transfer of  
295 motor learning effects among tasks will be high when muscle synergies involved in different motor tasks  
296 are shared <sup>58</sup>.

### 297 *Limitations*

298           Our study had several limitations. First, it has been reported that the number of recording  
299 muscles may affect the amount and structure of muscle synergies <sup>59</sup>. Although EMG recordings in our  
300 study were relatively large (i.e., 26 EMG channels), we limited the recording of EMGs from only the  
301 major muscles in the trunk and lower limbs. Similarly, we were also limited to 24 fundamental tasks that  
302 involved only locomotion and postural tasks. As such, tasks that accompany coordination between the  
303 upper limbs, trunk, and lower limbs were not considered <sup>5</sup>. Thus, it is conceivable that some relevant  
304 muscle synergies may have been missed in our study. Second, because we used a larger set of EMG  
305 recordings and tasks, our time constraint during experiments precluded the measurement of kinematic  
306 data such as joint angles as well as velocities, and allowed variability of movements in each task, which  
307 may impact muscle synergy extractions. The lack of availability of kinematic data ceases to separates  
308 the movement phase and thus unable to investigate the contributions of the fundamental muscle

309 synergies for each phase of each task<sup>44</sup>. Lastly, although we extract the fundamental muscle synergies  
310 using NMF that may present neural mechanisms for diverse human behaviors, whether the  
311 factorization-derived synergies reflect neural organization to coordinate human behaviors remains  
312 questionable<sup>24</sup>. This can be due to the possibility that extracted muscle synergies represent  
313 biomechanical constraints of tasks rather than neural constraints<sup>60</sup> and the nonlinearity in magnitude  
314 summations of the EMG or force vectors<sup>61,62</sup>.

## 315 **Conclusion**

316 In this paper, we extracted a repertoire of fundamental muscle synergies from the EMGs during  
317 a variety of human behaviors that involve trunk and lower limb movements in healthy individuals. We  
318 found that the flexible recruitment of the fundamental muscle synergies in either the independent or  
319 merging state can account for almost all 24 behaviors, including locomotion and stability tasks. Our  
320 findings may support the notion that low dimensional motor modules are required in a diverse range of  
321 human behaviors with different biomechanical contexts.

## 322 **Data availability**

323 All data are available upon reasonable request.

324 **References**

- 325 1. Bernstein, N. A. *The Co-ordination and Regulation of Movements*. (1994).
- 326 2. Bizzi, E., Cheung, V. C. K., d'Avella, A., Saltiel, P. & Tresch, M. Combining modules for  
327 movement. *Brain Res. Rev.* **57**, 125–133 (2008).
- 328 3. Turvey, M. T. Action and perception at the level of synergies. *Hum. Mov. Sci.* **26**, 657–697  
329 (2007).
- 330 4. d'Avella, A., Giese, M., Ivanenko, Y. P., Schack, T. & Flash, T. Editorial: Modularity in motor  
331 control: from muscle synergies to cognitive action representation. *Frontiers in Computational*  
332 *Neuroscience* **9**, (2015).
- 333 5. Bizzi, E. & Cheung, V. C. K. The neural origin of muscle synergies. *Front Comput Neurosci.*  
334 2013; 7: 51. (2013).
- 335 6. Meyer, A. J. *et al.* Muscle Synergies Facilitate Computational Prediction of {Subject-Specific}  
336 Walking Motions. *Front Bioeng Biotechnol* **4**, 77 (2016).
- 337 7. Cappellini, G., Ivanenko, Y. P., Poppele, R. E. & Lacquaniti, F. Motor Patterns in Human  
338 Walking and Running. *Journal of Neurophysiology* **95**, 3426–3437 (2006).
- 339 8. Yokoyama, H., Ogawa, T., Kawashima, N., Shinya, M. & Nakazawa, K. Distinct sets of  
340 locomotor modules control the speed and modes of human locomotion. *Sci. Rep.* **6**, 36275  
341 (2016).
- 342 9. Ivanenko, Y. P., Poppele, R. E. & Lacquaniti, F. Five basic muscle activation patterns account  
343 for muscle activity during human locomotion. *J. Physiol.* **556**, 267–282 (2004).
- 344 10. d'Avella, A., Fernandez, L., Portone, A. & Lacquaniti, F. Modulation of phasic and tonic muscle  
345 synergies with reaching direction and speed. *J. Neurophysiol.* **100**, 1433–1454 (2008).
- 346 11. Shaharudin, S. & Agrawal, S. Muscle synergies during incremental rowing {VO<sub>2</sub>max} test of  
347 collegiate rowers and untrained subjects. *J. Sport. Med. Phys. Fit.* **56**, 980–989 (2016).
- 348 12. Kristiansen, M., Samani, A., Madeleine, P. & Hansen, E. A. Muscle synergies during bench  
349 press are reliable across days. *J. Electromyogr. Kinesiol.* **30**, 81–88 (2016).
- 350 13. Vaz, J. R. *et al.* Muscle coordination during breaststroke swimming: Comparison between elite  
351 swimmers and beginners. *J. Sport. Sci.* **34**, 1941–1948 (2016).

- 352 14. Scano, A. *et al.* A Comprehensive Spatial Mapping of Muscle Synergies in Highly Variable  
353 {Upper-Limb} Movements of Healthy Subjects. *Front. Physiol.* **10**, 1231 (2019).
- 354 15. Nazifi, M. M., Yoon, H. U., Beschoner, K. & Hur, P. Shared and {Task-Specific} Muscle  
355 Synergies during Normal Walking and Slipping. *Front. Hum. Neurosci.* **11**, 40 (2017).
- 356 16. Santuz, A., Ekizos, A., Eckardt, N., Kibele, A. & Arampatzis, A. Challenging human  
357 locomotion: stability and modular organisation in unsteady conditions. *Sci. Rep.* **8**, 2740  
358 (2018).
- 359 17. Yang, Q., Logan, D. & Giszter, S. F. Motor primitives are determined in early development and  
360 are then robustly conserved into adulthood. *Proc. Natl. Acad. Sci. U. S. A.* **116**, 12025–12034  
361 (2019).
- 362 18. Cheung, V. C. K. *et al.* Plasticity of muscle synergies through fractionation and merging during  
363 development and training of human runners. *Nat. Commun.* **11**, 4356 (2020).
- 364 19. Chvatal, S. A. & Ting, L. H. Common muscle synergies for balance and walking. *Front.*  
365 *Comput. Neurosci.* **7**, 48 (2013).
- 366 20. Martino, G. *et al.* Neuromuscular adjustments of gait associated with unstable conditions. *J.*  
367 *Neurophysiol.* **114**, 2867–2882 (2015).
- 368 21. d’Avella, A. & Bizzi, E. Shared and specific muscle synergies in natural motor behaviors. *Proc.*  
369 *Natl. Acad. Sci. U. S. A.* **102**, 3076–3081 (2005).
- 370 22. David, L., Gallahue, O., Goodway, J. C. & Jacqueline, D. *Understanding Motor Development:*  
371 *Infants, Children, Adolescents, Adults.* (McGraw-Hill, 2011).
- 372 23. Bizzi, E. & Cheung, V. C. K. The neural origin of muscle synergies. *Front. Comput. Neurosci.*  
373 **7**, 1–6 (2013).
- 374 24. Cheung, V. C. K. & Seki, K. Approaches to Revealing the Neural Basis of Muscle Synergies: A  
375 Review and A Critique. *J. Neurophysiol.* jn.00625.2019 (2021). doi:10.1152/jn.00625.2019
- 376 25. Barroso, F. O. *et al.* Shared muscle synergies in human walking and cycling. *J. Neurophysiol.*  
377 **112**, 1984–1998 (2014).
- 378 26. Sartori, M., Gizzi, L., Lloyd, D. G. & Farina, D. A musculoskeletal model of human locomotion  
379 driven by a low dimensional set of impulsive excitation primitives. *Front. Comput. Neurosci.* **7**,  
380 79 (2013).

- 381 27. Cook, G., Burton, L., Hoogenboom, B. J. & Voight, M. Functional movement screening: the  
382 use of fundamental movements as an assessment of function-part 2. *Int. J. Sports Phys. Ther.*  
383 **9**, 549–63 (2014).
- 384 28. Cook, G., Burton, L., Hoogenboom, B. J. & Voight, M. Functional movement screening: the  
385 use of fundamental movements as an assessment of function - part 1. *Int. J. Sports Phys.*  
386 *Ther.* **9**, 396–409 (2014).
- 387 29. Hug, F. Can muscle coordination be precisely studied by surface electromyography? *J.*  
388 *Electromyogr. Kinesiol.* **21**, 1–12 (2011).
- 389 30. Ranaldi, S., De Marchis, C. & Conforto, S. An automatic, adaptive, information-based  
390 algorithm for the extraction of the {sEMG} envelope. *J. Electromyogr. Kinesiol.* **42**, 1–9 (2018).
- 391 31. De Marchis, C. *et al.* Modular motor control of the sound limb in gait of people with trans-  
392 femoral amputation. *J. Neuroeng. Rehabil.* **16**, 132 (2019).
- 393 32. Geng, Y. *et al.* Modulation of muscle synergies for multiple forearm movements under variant  
394 force and arm position constraints. *J. Neural Eng.* **17**, (2020).
- 395 33. Tresch, M. C., Cheung, V. C. K. & d'Avella, A. Matrix factorization algorithms for the  
396 identification of muscle synergies: evaluation on simulated and experimental data sets. *J.*  
397 *Neurophysiol.* **95**, 2199–2212 (2006).
- 398 34. Lee, D. D. & Seung, H. S. Learning the parts of objects by non-negative matrix factorization.  
399 *Nature* **401**, 788–791 (1999).
- 400 35. Chvatal, S. A., Torres-Oviedo, G., Safavynia, S. A. & Ting, L. H. Common muscle synergies  
401 for control of center of mass and force in nonstepping and stepping postural behaviors. *J.*  
402 *Neurophysiol.* **106**, 999–1015 (2011).
- 403 36. Torres-Oviedo, G., Macpherson, J. M. & Ting, L. H. Muscle synergy organization is robust  
404 across a variety of postural perturbations. *J. Neurophysiol.* **96**, 1530–1546 (2006).
- 405 37. Zar, J. H. *Biostatistical analysis.* (Pearson Education India, 1999).
- 406 38. Frère, J. & Hug, F. Between-subject variability of muscle synergies during a complex motor  
407 skill. *Front. Comput. Neurosci.* **6**, 99 (2012).
- 408 39. Delis, I., Hilt, P. M., Pozzo, T., Panzeri, S. & Berret, B. Deciphering the functional role of  
409 spatial and temporal muscle synergies in whole-body movements. *Sci. Rep.* **8**, 8391 (2018).



- 410 40. Tibshirani, R., Walther, G. & Hastie, T. Estimating the number of clusters in a data set via the  
411 gap statistic. *J. R. Stat. Soc. Ser. B Stat. Methodol.* **63**, 411–423 (2001).
- 412 41. Cheung, V. C. K. *et al.* Muscle synergy patterns as physiological markers of motor cortical  
413 damage. *Proc. Natl. Acad. Sci. U. S. A.* **109**, 14652–14656 (2012).
- 414 42. Hagio, S., Fukuda, M. & Kouzaki, M. Identification of muscle synergies associated with gait  
415 transition in humans. *Front. Hum. Neurosci.* **9**, 48 (2015).
- 416 43. Hodges, P. W. & Richardson, C. A. Contraction of the Abdominal Muscles Associated With  
417 Movement of the Lower Limb. *Phys. Ther.* **77**, 132–142 (1997).
- 418 44. Ting, L. H. *et al.* Neuromechanical principles underlying movement modularity and their  
419 implications for rehabilitation. *Neuron* **86**, 38–54 (2015).
- 420 45. Takei, T., Confais, J., Tomatsu, S., Oya, T. & Seki, K. Neural basis for hand muscle synergies  
421 in the primate spinal cord. *Proc. Natl. Acad. Sci. U. S. A.* **114**, 8643–8648 (2017).
- 422 46. Cheung, V. C. K. *et al.* Stability of muscle synergies for voluntary actions after cortical stroke in  
423 humans. *Proc. Natl. Acad. Sci. U. S. A.* **106**, 19563–19568 (2009).
- 424 47. Dominici, N. *et al.* Locomotor primitives in newborn babies and their development. *Science*  
425 *(80- )*. **334**, 997–999 (2011).
- 426 48. Hart, C. B. & Giszter, S. F. A neural basis for motor primitives in the spinal cord. *J. Neurosci.*  
427 **30**, 1322–1326 (2010).
- 428 49. McCrea, D. A. & Rybak, I. A. Organization of mammalian locomotor rhythm and pattern  
429 generation. *Brain Research Reviews* **57**, 134–146 (2008).
- 430 50. Liew, B. X. W., Vecchio, A. Del & Falla, D. The influence of musculoskeletal pain disorders on  
431 muscle synergies—A systematic review. *PLoS One* **13**, (2018).
- 432 51. Bekius, A. *et al.* Muscle Synergies During Walking in Children With Cerebral Palsy: A  
433 Systematic Review. *Front. Physiol.* **11**, (2020).
- 434 52. Van Criekinge, T. *et al.* Lower limb muscle synergies during walking after stroke: a systematic  
435 review. *Disability and Rehabilitation* **42**, 2836–2845 (2020).
- 436 53. Taborri, J. *et al.* Feasibility of muscle synergy outcomes in clinics, robotics, and sports: A  
437 systematic review. *Applied Bionics and Biomechanics* **2018**, (2018).
- 438 54. Cheung, V. C. K. *et al.* Muscle synergy patterns as physiological markers of motor cortical  
439 damage. *Proc. Natl. Acad. Sci. U. S. A.* **109**, 14652–14656 (2012).

- 440 55. Ambrosini, E. *et al.* Changes in leg cycling muscle synergies after training augmented by  
441 functional electrical stimulation in subacute stroke survivors: a pilot study. *J. Neuroeng.*  
442 *Rehabil.* **17**, 35 (2020).
- 443 56. Niu, C. *et al.* Effectiveness of short-term training with a synergy-based FES paradigm on motor  
444 function recovery post-stroke. *Ann. Phys. Rehabil. Med.* **61**, e33 (2018).
- 445 57. Kantak, S. S., Zahedi, N. & McGrath, R. Complex Skill Training Transfers to Improved  
446 Performance and Control of Simpler Tasks After Stroke. *Phys. Ther.* **97**, 718–728 (2017).
- 447 58. De Marchis, C., Di Somma, J., Zych, M., Conforto, S. & Severini, G. Consistent visuomotor  
448 adaptations and generalizations can be achieved through different rotations of robust motor  
449 modules. *Sci. Rep.* **8**, 12657 (2018).
- 450 59. Steele, K. M., Tresch, M. C. & Perreault, E. J. The number and choice of muscles impact the  
451 results of muscle synergy analyses. *Front. Comput. Neurosci.* **7**, 105 (2013).
- 452 60. Tresch, M. C. & Jarc, A. The case for and against muscle synergies. *Curr. Opin. Neurobiol.* **19**,  
453 601–607 (2009).
- 454 61. Lemay, M. A., Galagan, J. E., Hogan, N. & Bizzi, E. Modulation and vectorial summation of the  
455 spinalized frog's hindlimb end-point force produced by intraspinal electrical stimulation of the  
456 cord. *IEEE Trans. Neural Syst. Rehabil. Eng.* **9**, 12–23 (2001).
- 457 62. Yaron, A., Kowalski, D., Yaguchi, H., Takei, T. & Seki, K. Forelimb force direction and  
458 magnitude independently controlled by spinal modules in the macaque. *Proc. Natl. Acad. Sci.*  
459 *U. S. A.* **117**, 27655–27666 (2020).

460

#### 461 **Acknowledgements**

462 We would like to thank Editage ([www.editage.com](http://www.editage.com)) for English language editing.

#### 463 **Author contributions**

464 Conception and design of the work H.S., H.Y. and A.S.; data acquisition H.S., A.S., and T.K.; data  
465 analysis H.S. and H.Y.; data interpretation H.S., H.Y., A.S., T.K. and K.N.; drafted the manuscript  
466 H.S., H.Y., A.S., T.K. and K.N. All authors approved the final version of the manuscript and agree to  
467 be accountable for the content of the work.

468 **Additional Information**

469 The authors declare no competing interests.

470

471 **Figure legends**

472 **Figure 1. Muscle synergies of all tasks. (a)** Centroids of the hierarchical clustering performed on the  
473 muscle synergies of all tasks across ten participants. **(b)** Dendrograms represent the results of cluster  
474 analysis (Ward's method, Euclidian distance) where optimal number of clusters were determined based  
475 on the gap statistics.

476

477 **Figure 2. The relationship between muscle synergies of all tasks and muscle synergies of**  
478 **locomotion tasks including (a) walk, (b) run, (c) bilateral jump and (d) sit-to-stand-to-sit.** The  
479 figures show the synergy cluster centroids of these tasks that could be explained by either a single or  
480 linearly combined multiple synergy cluster centroids of all tasks (synergies in blue) matched by  
481 maximizing scalar product  $> 0.75$ . Observed muscle synergies extracted from the single-task EMG  
482 (orange) and their reconstructions by merging their respective  $W_1$ - combinations (dark orange) are  
483 further presented.

484

485 **Figure 3. The relationship between muscle synergies of all tasks and muscle synergies of**  
486 **stability tasks including (a) left lunge, (b) cat-and-dog, (c) forward bend and (d) left rotation.** The  
487 figures show the synergy cluster centroids of these task that could be explained by either a single or  
488 linearly combined multiple synergy cluster centroids of all tasks (synergies in blue) matched by  
489 maximizing scalar product  $> 0.75$ . Observed muscle synergies extracted from the single-task EMG  
490 (orange) and their reconstructions by merging their respective  $W_1$ - combinations (dark orange) were  
491 further presented.

492

493 **Figure 4. A hypothetical neural mechanism of merged fundamental muscle synergies with its**  
494 **temporal patterns in a diverse range of human behaviors.** This model shows that the CNS flexibly  
495 recruits multiple synergies for different tasks. For example,  $C_{task1-1}$  with  $W_1$  and  $W_2$  and  $C_{task1-2}$  with  $W_2$   
496 and  $W_3$  turn on while  $C_{task2-1}$  and  $C_{task2-2}$  turn off to execute task 1. Similarly,  $C_{task1-1}$  with  $W_1$ ,  $W_2$ , and  $W_3$   
497 and  $C_{task1-2}$  with  $W_2$ ,  $W_3$ , and  $W_4$  turn on, ceasing to be active in  $C_{task1-1}$  and  $C_{task1-2}$  for task 2.

498 **Table legends**

499 **Table 1. Movement and postural tasks.** Shown are the order of 24 locomotion and stability task.  
500 Stability tasks are divided into three subcategories: static postures, dynamic postures and axial. Rt:  
501 right; Lt: left.

502

503 **Table 2. Characteristics of muscle synergy clusters of all tasks.** The following pairs showed high  
504 similarity when the muscles in W6 to W10 were reordered so that muscles on the left side of W6 to  
505 W10 corresponded to the same muscles on the right side of W1 to W5: W1 and W6 (SP = 0.93), W2  
506 and W7 (SP = 0.97), W3 and W8 (SP = 0.97), W4 and W9 (SP = 0.85), W5, and W10 (SP = 0.93).  
507 We categorized W1 to W5 as muscle synergies with right-side dominant patterns and W6 to W10 as  
508 muscle synergies with left-side dominant patterns. W11, W12, and W13 were categorized as bilateral  
509 patterns. Muscles that account for > 0.5 of activation levels are classified as major muscles and  
510 between 0.1 to 0.5 were as minor muscles. isp: ipsilateral, con: contralateral, bil: bilateral.

511

512 **Table 3. The relationship between synergy clusters of each task and synergy clusters of all**  
513 **tasks.** The number of synergy clusters for each task and the number of a single or merged synergy  
514 cluster centroids of all tasks that were well matched (scalar product > 0.75) or unmatched to a  
515 synergy cluster centroid of each task. Bil: bilateral; Rt: right; Lt left; JP: jump; SJP: single leg jump;  
516 STS: sit-to-stand-to-sit; SLS: single leg stance; DS: deep squat; SS: single leg squat; LG: lunge; RB:  
517 rocking backward; RF: rocking forward; CE: cross extension; CD: cat-and-dog; FB; forward bend; SB:  
518 side bend; BB: backward bend; RT: rotation.

519

520 Figure 1:

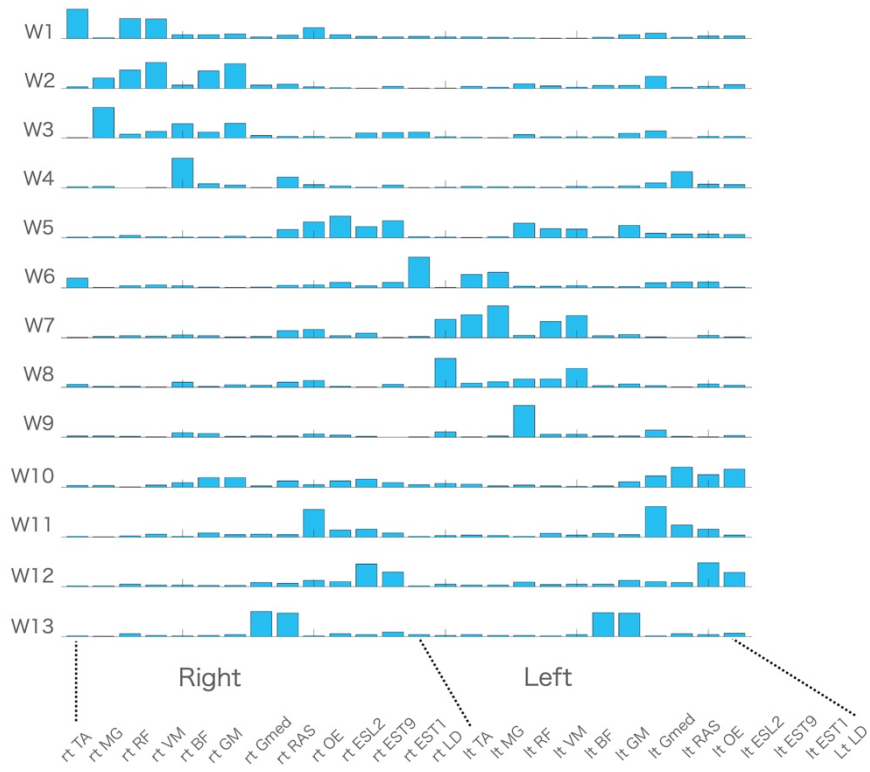

521

522 Figure 2:

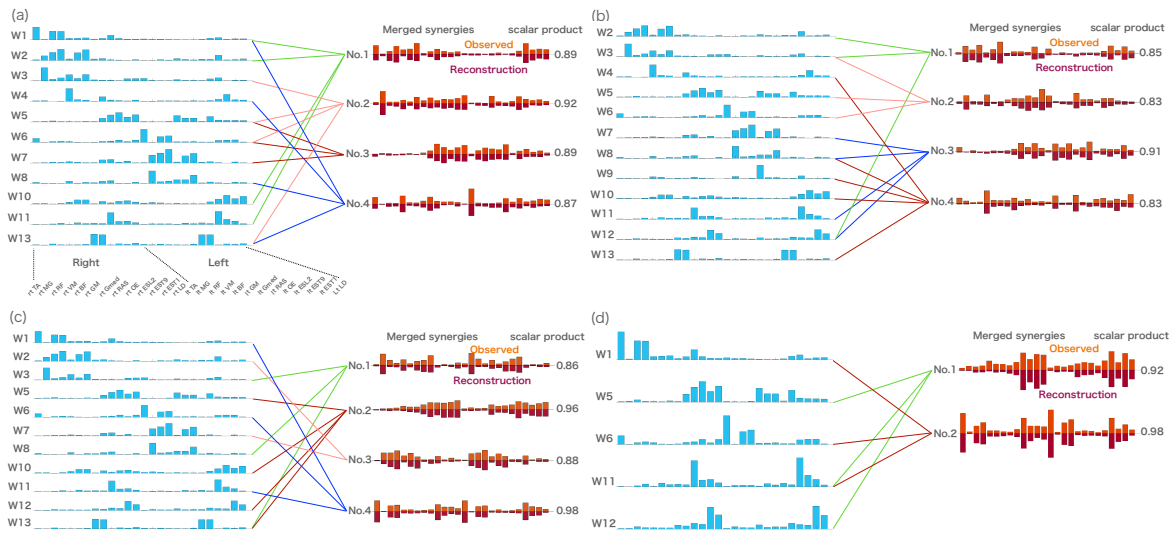

523

524

525 Figure 3:

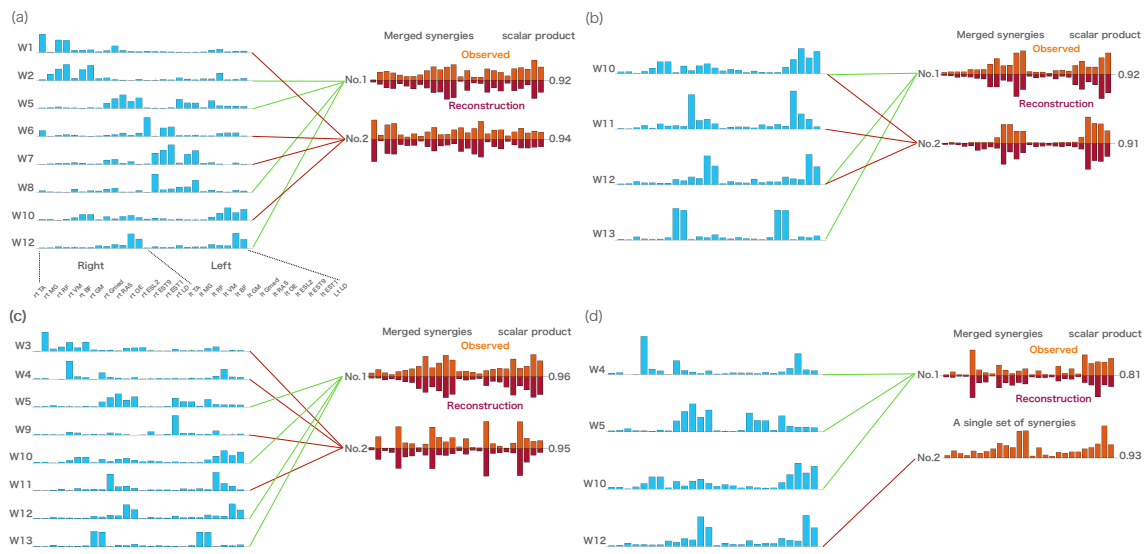



528 Figure 4:

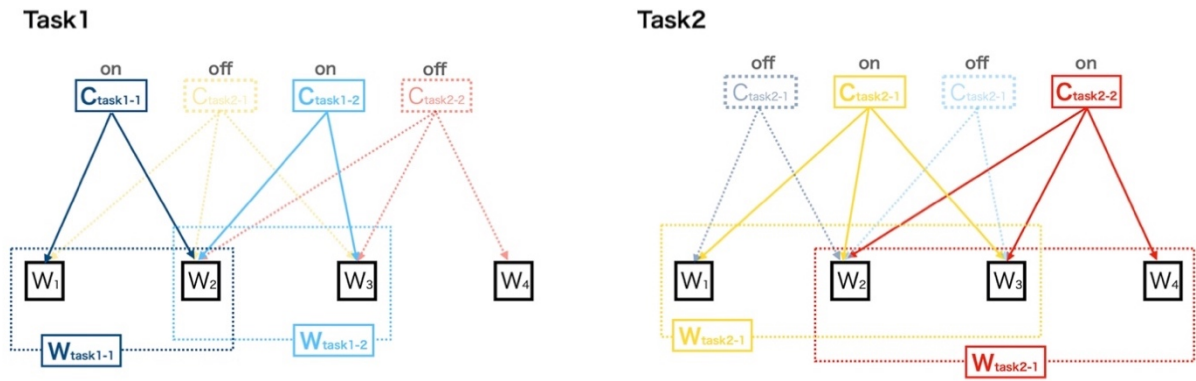

529

530 Table 1:

|            |                  |    |                      |     |
|------------|------------------|----|----------------------|-----|
| Locomotion |                  | 1  | Walk (1.5 m/s)       | 531 |
|            |                  | 2  | Run (2.7 m/s)        | 532 |
|            |                  | 3  | Bilateral jump       | 533 |
|            |                  | 4  | Rt single leg jump   | 534 |
|            |                  | 5  | Lt single leg jump   | 535 |
|            |                  | 6  | Sit to stand to sit  | 536 |
| Stability  | Static postures  | 7  | Rt single leg stance | 537 |
|            |                  | 8  | Lt single leg stance | 538 |
|            | Dynamic postures | 9  | Deep squat           | 539 |
|            |                  | 10 | Rt single leg squat  | 540 |
|            |                  | 11 | Lt single leg squat  | 541 |
|            |                  | 12 | Rt lunge             | 542 |
|            |                  | 13 | Lt lunge             | 543 |
|            |                  | 14 | Rocking backward     | 544 |
|            |                  | 15 | Rocking forward      | 545 |
|            |                  | 16 | Rt cross extension   | 546 |
|            |                  | 17 | Lt cross extension   | 547 |
|            |                  | 18 | Cat-and-dog          | 548 |
|            | Axial            | 19 | Forward bend         | 549 |
|            |                  | 20 | Rt side bend         | 550 |
|            |                  | 21 | Lt side bend         | 551 |
|            |                  | 22 | Backward bend        | 552 |
|            |                  | 23 | Rt rotation          | 553 |
|            |                  | 24 | Lt rotation          | 554 |
|            |                  |    | 555                  |     |

556 Table 2:

| Unilateral patterns |               | Major muscles                | Minor muscles                                                                             |
|---------------------|---------------|------------------------------|-------------------------------------------------------------------------------------------|
| Right patterns      | Left patterns |                              |                                                                                           |
| W1                  | W6            | ispTA, ispRF, ispVM          | (ispESL2, ispEST9, ispEST1, conTA, conESL2, conEST9, conLD)                               |
| W2                  | W7            | ispVM, ispRF, ispGM, ispGmed | (ispMG, ispOE, conBF, conOE, conESL2)                                                     |
| W3                  | W8            | ispMG, ispGmed               | (ispRF, ispVM, ispBF, ispGM, ispEST1, ispLD, conTA, conBF, contOE, conESL2)               |
| W4                  | W9            | ispBF                        | (ispMG, ispGM, ispOE, ispESL2, conESL2, conEST9)                                          |
| W5                  | W10           | ispEST9, ispLD               | (ispOE, ispESL2, ispEST1, conBF, conGM, conGmed, conOE, conESL2, conEST9, conEST1, conLD) |
| Bilateral patterns  |               |                              |                                                                                           |
| M11                 |               | bilESL2                      | (bilEST9, bilEST1)                                                                        |
| M12                 |               | bilEST1                      | (bilLD)                                                                                   |
| M13                 |               | bilRAS, bilOE                |                                                                                           |

557
